# Supplementary material for: Nuclear-Cytoplasmic Conflict in Pea (Pisum sativum L.) Is Associated with Nuclear and Plastidic Candidate Genes Encoding Acetyl-CoA Carboxylase Subunits
Source: PLoS One. 2015 Mar 19;10(3):e0119835. doi: 10.1371/journal.pone.0119835 (PMC4366379; doi:10.1371/journal.pone.0119835)
Supplement: S1 Table — The mean percentage ± standard error (%) of viable (‘fertile’) pollen grains among all pollen grains counted in samples of n flowers from N analysed plants are given. (PDF) [file pone.0119835.s003.pdf]

## S1 TABLE

FOR THE PAPER

### **Nuclear-cytoplasmic conflict in pea (*Pisum sativum* L.) is associated with nuclear and plastidic candidate genes encoding Acetyl-CoA carboxylase subunits.**

Vera S. Bogdanova<sup>1</sup>, Olga O. Zaytseva<sup>1,2</sup>, Anatoliy V. Mglinets<sup>1</sup>, Natalia V. Shatskaya<sup>1</sup>, Oleg E. Kosterin<sup>1,2</sup> and Gennadiy V. Vasiliev<sup>1</sup>

<sup>1</sup>Institute of Cytology and Genetics of the Siberian Branch of Russian Academy of Sciences, Acad. Lavrentyev ave. 10, Novosibirsk, 630090. Russia

<sup>2</sup>Novosibirsk State University, Pirogova str. 2, Novosibirsk, 630090. Russia

#### **S1 Table. Pollen fertility in reciprocal F1 hybrids between pea accessions VIR320, L100 and 721 and in these accessions themselves (the main diagonal).**

The mean percentage  $\pm$  standard error (%) of viable ('fertile') pollen grains among all pollen grains counted in samples of  $n$  flowers from  $N$  analysed plants are given.

| Paternal parent | VIR320                            | L100                                | 721                                |
|-----------------|-----------------------------------|-------------------------------------|------------------------------------|
| Maternal parent |                                   |                                     |                                    |
| VIR320          | 93.57 $\pm$ 2.41<br>$n=6$ ; $N=4$ | 71.62 $\pm$ 1.92<br>$n=19$ ; $N=12$ | 6.08 $\pm$ 4.61<br>$n=5$ ; $N=1$   |
| L100            | 75.14 $\pm$ 2.25<br>$n=8$ ; $N=6$ | 96.85 $\pm$ 0.65<br>$n=14$ ; $N=10$ | 42.65 $\pm$ 1.87<br>$n=12$ ; $N=6$ |
| 721             | 71.6 $\pm$ 1.59<br>$n=12$ ; $N=6$ | 92.36 $\pm$ 0.77<br>$n=14$ ; $N=7$  | 94.51 $\pm$ 2.34<br>$n=7$ ; $N=5$  |

Pollen fertility of F1 hybrids is considered as an indirect indicator of compatibility/incompatibility of the cross performed. Fertility of 50% or less is usually associated with incompatible cross combinations

Plants were grown in a greenhouse in hydroponic beds 4x1 m filled with drainage gravel and fed thrice a day by the standard Knop nutrient solution. Acetocarmine stained pollen (Singh, 2003) was analysed under microscope by counting viable (stained cytoplasm) and dead pollen grains, in total 300-700 grains from an open flower or mature flower bud, with the exception of the VIR320 $\times$ 721 hybrids which were weak and usually did not flower. One plant produced nearly-abortion flowers, some of which had scarce pollen which was analysed.

The data are preliminary,  $n$  and  $N$  to be increased.

Singh RJ (2003) Plant Cytogenetics. 2nd ed. CRC Press, Boca Raton. p.21
